# Supplementary material for: Comparison of halocarbon measurements in an atmospheric dry whole air sample
Source: Oxford University Press journal article supplement (doi:10.12952/journal.elementa.000075), 2015-01-01
Supplement: elementa_000075_s001.docx [file elementa_000075_s001.docx]

Supporting Table S‑1. Comparison time table.

Comparison Timeline Laboratory Function

October 2010 Preparation of mixture and analysis by NOAA

January 2011 2nd analysis by NOAA

February 2012 1st Analysis of mixture by NIST

March 2012 Analysis of mixture by SIO

April 2012 Analysis of mixture by Empa

August 2012 Analysis of mixture by KRISS

December 2012 2nd Analysis of mixture by NIST

February 2013 3rd Analysis of mixture by NOAA

March 2013 Reports of the participants to NIST
