# Supplementary material for: Comparison of halocarbon measurements in an atmospheric dry whole air sample
Source: Oxford University Press journal article supplement (doi:10.12952/journal.elementa.000075), 2015-01-01
Supplement: elementa_000075_s002.docx [file elementa_000075_s002.docx]

Table S‑2. Inter-calibration factors to the NOAA values.
